# Supplementary material for: Evaluation of the Association of Recombinant Proteins NanH and PknG from Corynebacterium pseudotuberculosis Using Different Adjuvants as a Recombinant Vaccine in Mice
Source: MDPI journal article supplement (doi:10.3390/vaccines11030519), 2023-02-23
Supplement: s1 [file s1]

## Supplementary Material

**ID manuscript vaccines-2210461: “Evaluation of the association of recombinant proteins NanH and PknG from *Corynebacterium pseudotuberculosis* using different adjuvants as a recombinant vaccine in mice”**

**Nicole Ramos Scholl <sup>1</sup>, Mara Thais de Oliveira Silva <sup>1</sup>, Tallyson Nogueira Barbosa<sup>1</sup>, Rodrigo Barros de Pinho <sup>1</sup>, Mirna Samara Dié Alves <sup>1</sup>, Ricardo Wagner Portela <sup>2</sup>, Vasco Ariston de Carvalho Azevedo <sup>3</sup>, Sibele Borsuk<sup>1\*</sup>**

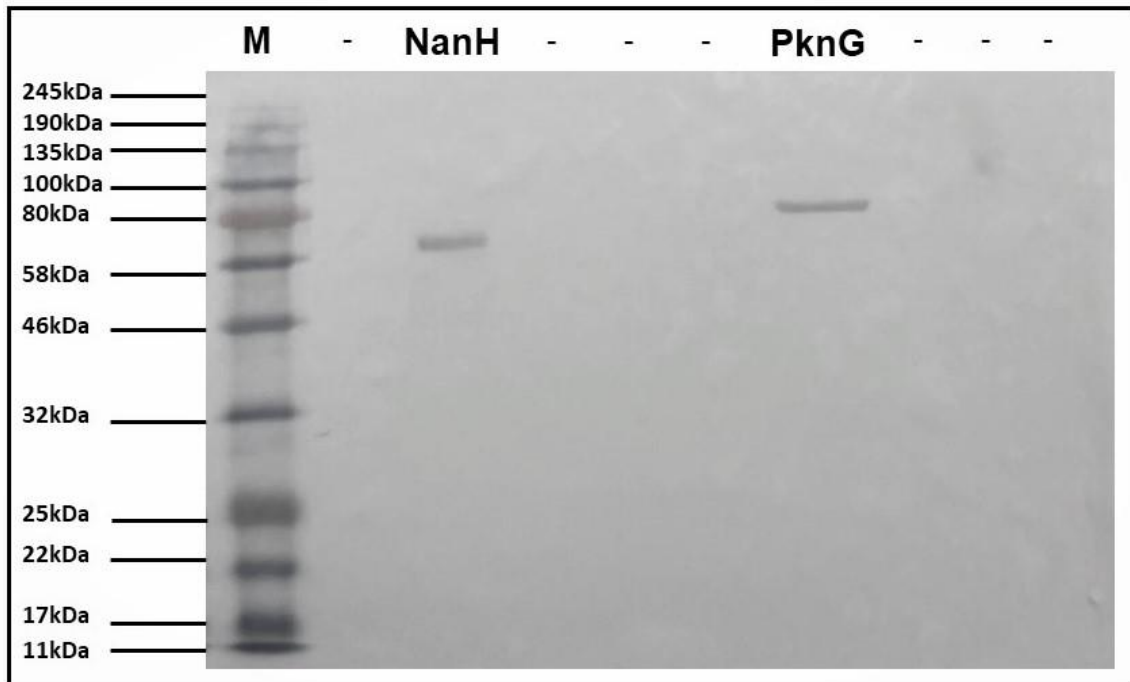

**Figure S1.** Identity characterization of the recombinant proteins NanH and PknG. Western Blot analysis of NanH and PknG proteins using an anti-6x His tag monoclonal antibody (Sigma Al-drich). (1) Pre-stained protein ladder; (2) purified rNanH; (3) purified rPknG and (-) are blanks. rNanH and rPknG are shown as reactive bands of approximately 70 kDa (2) and 80 kDa (3), respectively.
